# Supplementary material
Source: publisher figshare collection journal article supplement (https://acs.figshare.com/ndownloader/files/4134601)
Supplement: Supplementary file 1 [file 4134601]

 
data_compound1
 
_audit_creation_method            SHELXL-97
_chemical_name_systematic
;
 ?
;
_chemical_name_common             ?
_chemical_melting_point           ?
_chemical_formula_moiety          'C60 H80 Cu4 Dy2 N11 O45'
_chemical_formula_sum
 'C60 H80 Cu4 Dy2 N11 O45'
_chemical_formula_weight          2254.51
 
loop_
 _atom_type_symbol
 _atom_type_description
 _atom_type_scat_dispersion_real
 _atom_type_scat_dispersion_imag
 _atom_type_scat_source
 'C'  'C'   0.0033   0.0016
 'International Tables Vol C Tables 4.2.6.8 and 6.1.1.4'
 'H'  'H'   0.0000   0.0000
 'International Tables Vol C Tables 4.2.6.8 and 6.1.1.4'
 'Cu'  'Cu'   0.3201   1.2651
 'International Tables Vol C Tables 4.2.6.8 and 6.1.1.4'
 'Dy'  'Dy'  -0.1892   4.4098
 'International Tables Vol C Tables 4.2.6.8 and 6.1.1.4'
 'N'  'N'   0.0061   0.0033
 'International Tables Vol C Tables 4.2.6.8 and 6.1.1.4'
 'O'  'O'   0.0106   0.0060
 'International Tables Vol C Tables 4.2.6.8 and 6.1.1.4'
 
_symmetry_cell_setting            'monoclinic'
_symmetry_space_group_name_H-M    'C2/c'
 
loop_
 _symmetry_equiv_pos_as_xyz
 'x, y, z'
 '-x, y, -z+1/2'
 'x+1/2, y+1/2, z'
 '-x+1/2, y+1/2, -z+1/2'
 '-x, -y, -z'
 'x, -y, z-1/2'
 '-x+1/2, -y+1/2, -z'
 'x+1/2, -y+1/2, z-1/2'
 
_cell_length_a                    27.030(5)
_cell_length_b                    17.193(5)
_cell_length_c                    17.594(5)
_cell_angle_alpha                 90.000(5)
_cell_angle_beta                  99.054(5)
_cell_angle_gamma                 90.000(5)
_cell_volume                      8075(4)
_cell_formula_units_Z             4
_cell_measurement_temperature     200(2)
_cell_measurement_reflns_used     ?
_cell_measurement_theta_min       ?
_cell_measurement_theta_max       ?
 
_exptl_crystal_description        'Block'
_exptl_crystal_colour             'green'
_exptl_crystal_size_max           0.10
_exptl_crystal_size_mid           0.08
_exptl_crystal_size_min           0.02
_exptl_crystal_density_meas       ?
_exptl_crystal_density_diffrn     1.855
_exptl_crystal_density_method     'not measured'
_exptl_crystal_F_000              4500
_exptl_absorpt_coefficient_mu     2.969
_exptl_absorpt_correction_type    'multi-scan'
_exptl_absorpt_correction_T_min   0.7556
_exptl_absorpt_correction_T_max   0.9430
_exptl_absorpt_process_details    'multi-scan absorption correction'
 
_exptl_special_details
;
 ?
;
 
_diffrn_ambient_temperature       200(2)
_diffrn_radiation_wavelength      0.71069
_diffrn_radiation_type            MoK\a
_diffrn_radiation_source          'fine-focus sealed tube'
_diffrn_radiation_monochromator   graphite
_diffrn_measurement_device_type   ?
_diffrn_measurement_method        ?
_diffrn_detector_area_resol_mean  ?
_diffrn_standards_number          ?
_diffrn_standards_interval_count  ?
_diffrn_standards_interval_time   ?
_diffrn_standards_decay_%         ?
_diffrn_reflns_number             13405
_diffrn_reflns_av_R_equivalents   0.0748
_diffrn_reflns_av_sigmaI/netI     0.0714
_diffrn_reflns_limit_h_min        -22
_diffrn_reflns_limit_h_max        25
_diffrn_reflns_limit_k_min        -16
_diffrn_reflns_limit_k_max        16
_diffrn_reflns_limit_l_min        -16
_diffrn_reflns_limit_l_max        16
_diffrn_reflns_theta_min          1.41
_diffrn_reflns_theta_max          19.50
_reflns_number_total              3477
_reflns_number_gt                 2284
_reflns_threshold_expression      >2\s(I)
 
_computing_data_collection        'Bruker SMART'
_computing_cell_refinement        'Bruker SMART'
_computing_data_reduction         'Bruker SAINT'
_computing_structure_solution     'SHELXL-97 (Sheldrick, 2008)'
_computing_structure_refinement   'SHELXL-97 (Sheldrick, 2008)'
_computing_molecular_graphics     'Bruker SHELXTL'
_computing_publication_material   'Bruker SHELXTL'
 
_refine_special_details
;
 Refinement of F^2^ against ALL reflections.  The weighted R-factor wR and
 goodness of fit S are based on F^2^, conventional R-factors R are based
 on F, with F set to zero for negative F^2^. The threshold expression of
 F^2^ > 2\s(F^2^) is used only for calculating R-factors(gt) etc. and is
 not relevant to the choice of reflections for refinement.  R-factors based
 on F^2^ are statistically about twice as large as those based on F, and R-
 factors based on ALL data will be even larger.
;
 
_refine_ls_structure_factor_coef  Fsqd
_refine_ls_matrix_type            full
_refine_ls_weighting_scheme       calc
_refine_ls_weighting_details
 'calc w=1/[\s^2^(Fo^2^)+(0.1188P)^2^+24.8262P] where P=(Fo^2^+2Fc^2^)/3'
_atom_sites_solution_primary      direct
_atom_sites_solution_secondary    difmap
_atom_sites_solution_hydrogens    geom
_refine_ls_hydrogen_treatment     mixed
_refine_ls_extinction_method      none
_refine_ls_extinction_coef        ?
_refine_ls_number_reflns          3477
_refine_ls_number_parameters      517
_refine_ls_number_restraints      21
_refine_ls_R_factor_all           0.0960
_refine_ls_R_factor_gt            0.0627
_refine_ls_wR_factor_ref          0.1939
_refine_ls_wR_factor_gt           0.1687
_refine_ls_goodness_of_fit_ref    1.046
_refine_ls_restrained_S_all       1.044
_refine_ls_shift/su_max           0.000
_refine_ls_shift/su_mean          0.000
 
loop_
 _atom_site_label
 _atom_site_type_symbol
 _atom_site_fract_x
 _atom_site_fract_y
 _atom_site_fract_z
 _atom_site_U_iso_or_equiv
 _atom_site_adp_type
 _atom_site_occupancy
 _atom_site_symmetry_multiplicity
 _atom_site_calc_flag
 _atom_site_refinement_flags
 _atom_site_disorder_assembly
 _atom_site_disorder_group
C1 C 1.0170(9) 0.0763(11) 0.5908(11) 0.069(6) Uani 1 1 d . . .
H1 H 1.0257 0.0533 0.6389 0.083 Uiso 1 1 calc R . .
C2 C 1.0499(7) 0.0675(10) 0.5373(12) 0.064(5) Uani 1 1 d . . .
H2 H 1.0794 0.0391 0.5496 0.077 Uiso 1 1 calc R . .
C3 C 1.0377(9) 0.1017(12) 0.4661(14) 0.080(7) Uani 1 1 d . . .
H3 H 1.0581 0.0954 0.4285 0.096 Uiso 1 1 calc R . .
C4 C 0.9943(11) 0.1458(13) 0.4519(11) 0.085(8) Uani 1 1 d . . .
H4 H 0.9865 0.1713 0.4049 0.102 Uiso 1 1 calc R . .
C5 C 0.9622(8) 0.1531(10) 0.5055(12) 0.060(5) Uani 1 1 d . . .
C6 C 0.9168(9) 0.1997(12) 0.4949(9) 0.077(6) Uani 1 1 d . . .
H6A H 0.8880 0.1655 0.4895 0.092 Uiso 1 1 calc R . .
H6B H 0.9151 0.2296 0.4478 0.092 Uiso 1 1 calc R . .
C7 C 0.9148(8) 0.2554(9) 0.5624(12) 0.074(6) Uani 1 1 d . . .
H7A H 0.9478 0.2773 0.5788 0.089 Uiso 1 1 calc R . .
H7B H 0.8921 0.2978 0.5454 0.089 Uiso 1 1 calc R . .
C8 C 1.0129(9) 0.4302(11) 0.9157(11) 0.070(6) Uani 1 1 d . . .
H8 H 1.0192 0.4528 0.8701 0.085 Uiso 1 1 calc R . .
C9 C 1.0501(10) 0.4379(14) 0.9844(18) 0.104(8) Uani 1 1 d . . .
H9 H 1.0792 0.4669 0.9855 0.125 Uiso 1 1 calc R . .
C10 C 1.0390(11) 0.4000(15) 1.0465(16) 0.088(8) Uani 1 1 d . . .
H10 H 1.0624 0.4015 1.0913 0.106 Uiso 1 1 calc R . .
C11 C 0.9954(12) 0.3588(12) 1.0481(13) 0.090(8) Uani 1 1 d . . .
H11 H 0.9895 0.3341 1.0928 0.108 Uiso 1 1 calc R . .
C12 C 0.9593(9) 0.3553(12) 0.9789(12) 0.073(6) Uani 1 1 d . . .
C13 C 0.9126(9) 0.3103(10) 0.9747(10) 0.075(6) Uani 1 1 d . . .
H13A H 0.8846 0.3459 0.9719 0.089 Uiso 1 1 calc R . .
H13B H 0.9138 0.2797 1.0213 0.089 Uiso 1 1 calc R . .
C14 C 0.9044(8) 0.2568(10) 0.9059(11) 0.082(7) Uani 1 1 d . . .
H14A H 0.9359 0.2321 0.9004 0.098 Uiso 1 1 calc R . .
H14B H 0.8810 0.2163 0.9147 0.098 Uiso 1 1 calc R . .
C15 C 0.8653(7) 0.4389(12) 0.6693(10) 0.052(5) Uani 1 1 d . . .
C16 C 0.8837(7) 0.5143(11) 0.6798(11) 0.052(5) Uani 1 1 d . . .
C17 C 0.8643(7) 0.5719(11) 0.6263(12) 0.064(5) Uani 1 1 d . . .
H17 H 0.8775 0.6219 0.6315 0.077 Uiso 1 1 calc R . .
C18 C 0.8271(9) 0.5564(12) 0.5678(12) 0.075(6) Uani 1 1 d . . .
H18 H 0.8127 0.5963 0.5361 0.090 Uiso 1 1 calc R . .
C19 C 0.8107(7) 0.4816(13) 0.5553(10) 0.063(5) Uani 1 1 d . . .
H19 H 0.7869 0.4695 0.5128 0.075 Uiso 1 1 calc R . .
C20 C 0.8295(7) 0.4254(10) 0.6054(11) 0.054(5) Uani 1 1 d . . .
C21 C 0.9258(9) 0.5333(11) 0.7383(12) 0.067(6) Uani 1 1 d . . .
H21 H 0.9393 0.5827 0.7348 0.081 Uiso 1 1 calc R . .
C22 C 0.7814(9) 0.3254(12) 0.5339(12) 0.128(10) Uani 1 1 d D . .
H22A H 0.7719 0.2800 0.5441 0.192 Uiso 1 1 d RD . .
H22B H 0.7983 0.3274 0.4970 0.192 Uiso 1 1 d RD . .
H22C H 0.7588 0.3601 0.5321 0.192 Uiso 1 1 d RD . .
C23 C 0.8693(7) 0.0647(11) 0.7681(9) 0.047(4) Uani 1 1 d . . .
C24 C 0.8876(8) -0.0098(10) 0.7660(10) 0.056(5) Uani 1 1 d . . .
C25 C 0.8646(8) -0.0712(12) 0.8031(11) 0.075(6) Uiso 1 1 d . . .
H25 H 0.8769 -0.1216 0.8019 0.090 Uiso 1 1 calc R . .
C26 C 0.8270(9) -0.0573(13) 0.8380(13) 0.095(8) Uani 1 1 d . . .
H26 H 0.8112 -0.0980 0.8593 0.114 Uiso 1 1 calc R . .
C27 C 0.8107(7) 0.0165(16) 0.8437(12) 0.084(6) Uani 1 1 d . . .
H27 H 0.7854 0.0254 0.8730 0.101 Uiso 1 1 calc R . .
C28 C 0.8296(8) 0.0798(12) 0.8081(10) 0.059(5) Uani 1 1 d . . .
C29 C 0.9280(7) -0.0260(11) 0.7253(12) 0.061(5) Uani 1 1 d . . .
H29 H 0.9385 -0.0775 0.7285 0.074 Uiso 1 1 calc R . .
C30 C 0.7781(9) 0.1745(13) 0.8598(14) 0.132(11) Uani 1 1 d . . .
H30A H 0.7717 0.2294 0.8563 0.198 Uiso 1 1 calc R . .
H30B H 0.7905 0.1609 0.9123 0.198 Uiso 1 1 calc R . .
H30C H 0.7476 0.1466 0.8426 0.198 Uiso 1 1 calc R . .
Cu1 Cu 0.91954(8) 0.39231(11) 0.82010(11) 0.0606(7) Uani 1 1 d . . .
Cu2 Cu 0.92949(8) 0.11907(11) 0.65552(11) 0.0541(7) Uani 1 1 d . . .
Dy1 Dy 0.85379(4) 0.25170(4) 0.71834(5) 0.0596(5) Uani 1 1 d . . .
N1 N 0.9697(7) 0.3915(8) 0.9156(8) 0.060(4) Uani 1 1 d . . .
N2 N 0.9731(6) 0.1164(8) 0.5771(8) 0.057(4) Uani 1 1 d . . .
N3 N 1.0000 0.2360(18) 0.7500 0.078(7) Uiso 1 2 d SU . .
N4 N 0.8331(9) -0.0006(13) 0.5665(10) 0.089(5) Uiso 1 1 d U . .
N5 N 0.6692(11) 0.1756(17) 0.6771(13) 0.121(7) Uiso 1 1 d . . .
N6 N 0.5412(17) 0.257(2) 0.790(2) 0.223(16) Uiso 1 1 d . . .
O1 O 0.8983(4) 0.2168(6) 0.6262(6) 0.064(3) Uani 1 1 d . . .
O3W O 0.7779(5) 0.3063(7) 0.7382(7) 0.085(4) Uani 1 1 d . . .
H1W3 H 0.7790 0.3499 0.7159 0.102 Uiso 1 1 d R . .
H2W3 H 0.7473 0.2925 0.7333 0.102 Uiso 1 1 d R . .
O2 O 0.8854(5) 0.2966(6) 0.8361(6) 0.075(4) Uani 1 1 d . . .
O4W O 0.7926(4) 0.1744(6) 0.6411(7) 0.078(4) Uani 1 1 d . . .
H1W4 H 0.8062 0.1417 0.6146 0.094 Uiso 1 1 d R . .
H2W4 H 0.7695 0.1509 0.6596 0.094 Uiso 1 1 d R . .
O3 O 0.8806(4) 0.3803(6) 0.7169(6) 0.054(3) Uani 1 1 d . . .
O5W O 0.8568(5) 0.4718(7) 0.8684(7) 0.086(4) Uani 1 1 d . . .
H1W5 H 0.8501 0.5033 0.8309 0.103 Uiso 1 1 d R . .
H2W5 H 0.8829 0.4885 0.8972 0.103 Uiso 1 1 d R . .
O4 O 0.9459(4) 0.4936(6) 0.7911(7) 0.058(3) Uani 1 1 d . . .
O1W O 0.7661(6) 0.3913(9) 0.8601(10) 0.141(7) Uani 1 1 d . . .
H1W1 H 0.7926 0.4068 0.8886 0.169 Uiso 1 1 d R . .
H2W1 H 0.7414 0.4141 0.8750 0.169 Uiso 1 1 d R . .
O5 O 0.8169(5) 0.3448(8) 0.6008(6) 0.078(4) Uani 1 1 d D . .
O2W O 0.6744(12) 0.2973(15) 0.9086(15) 0.270(15) Uani 1 1 d . . .
H1W2 H 0.6560 0.3175 0.9383 0.324 Uiso 1 1 d R . .
H2W2 H 0.6574 0.2620 0.8826 0.324 Uiso 1 1 d R . .
O6 O 0.8882(4) 0.1255(6) 0.7368(6) 0.052(3) Uani 1 1 d . . .
O7 O 0.8157(4) 0.1538(7) 0.8109(7) 0.066(3) Uani 1 1 d . . .
O8 O 0.9508(5) 0.0141(7) 0.6881(7) 0.067(4) Uani 1 1 d . . .
O9 O 0.9692(6) 0.2852(8) 0.7512(8) 0.096 Uiso 1 1 d . . .
O10 O 1.0000 0.1774(12) 0.7500 0.104(7) Uani 1 2 d SU . .
O11 O 0.8535(5) 0.0610(9) 0.5640(8) 0.097 Uiso 1 1 d . . .
O12 O 0.8476(9) -0.0619(13) 0.5516(12) 0.183(9) Uani 1 1 d U . .
O13 O 0.7920(7) 0.0057(10) 0.5869(12) 0.146(7) Uani 1 1 d . . .
O14 O 0.6866(6) 0.2433(9) 0.6823(12) 0.128(7) Uani 1 1 d . . .
O15 O 0.7020(8) 0.1210(11) 0.6683(11) 0.145(7) Uani 1 1 d . . .
O16 O 0.6288(8) 0.1523(14) 0.6792(11) 0.199(12) Uani 1 1 d . . .
O17 O 0.6045(16) 0.2611(12) 0.798(2) 0.243(14) Uani 1 1 d . . .
O18 O 0.5000 0.300(2) 0.7500 0.186(13) Uani 1 2 d S . .
O19 O 0.5000 0.1968(18) 0.7500 0.143(9) Uani 1 2 d S . .
 
loop_
 _atom_site_aniso_label
 _atom_site_aniso_U_11
 _atom_site_aniso_U_22
 _atom_site_aniso_U_33
 _atom_site_aniso_U_23
 _atom_site_aniso_U_13
 _atom_site_aniso_U_12
C1 0.093(18) 0.057(14) 0.061(13) 0.001(11) 0.023(14) -0.026(13)
C2 0.078(16) 0.053(13) 0.062(14) -0.020(11) 0.014(13) -0.022(11)
C3 0.086(19) 0.073(16) 0.10(2) -0.026(14) 0.058(15) -0.011(14)
C4 0.13(2) 0.078(17) 0.059(13) -0.026(12) 0.049(16) -0.065(17)
C5 0.075(16) 0.022(11) 0.079(17) -0.006(10) 0.003(13) -0.015(10)
C6 0.12(2) 0.075(15) 0.035(11) 0.008(11) 0.021(11) -0.004(15)
C7 0.072(15) 0.048(12) 0.103(17) 0.031(12) 0.021(12) -0.008(10)
C8 0.085(18) 0.052(14) 0.067(15) -0.015(10) -0.008(14) 0.008(13)
C9 0.12(2) 0.069(17) 0.12(2) -0.029(17) -0.01(2) 0.034(15)
C10 0.10(2) 0.060(17) 0.09(2) -0.034(15) -0.029(16) 0.032(16)
C11 0.16(3) 0.034(13) 0.078(19) -0.001(11) 0.019(19) 0.036(15)
C12 0.12(2) 0.061(15) 0.037(13) -0.001(11) 0.000(14) 0.005(14)
C13 0.12(2) 0.043(12) 0.056(13) 0.007(10) -0.009(12) 0.003(13)
C14 0.103(18) 0.057(14) 0.075(15) 0.015(13) -0.017(13) -0.004(12)
C15 0.077(15) 0.053(16) 0.030(12) 0.001(11) 0.016(11) 0.014(12)
C16 0.060(14) 0.037(13) 0.060(13) 0.007(11) 0.010(11) 0.010(12)
C17 0.069(15) 0.052(14) 0.065(13) -0.006(12) -0.010(12) -0.019(11)
C18 0.100(19) 0.041(15) 0.083(16) 0.009(11) 0.007(15) 0.011(13)
C19 0.069(14) 0.064(15) 0.052(12) 0.025(12) -0.001(10) 0.010(12)
C20 0.081(15) 0.034(13) 0.049(13) -0.015(11) 0.011(12) -0.015(11)
C21 0.11(2) 0.040(13) 0.062(15) -0.002(11) 0.043(15) -0.001(13)
C22 0.18(3) 0.079(17) 0.107(19) 0.008(14) -0.047(19) -0.022(17)
C23 0.045(13) 0.050(15) 0.042(11) 0.008(10) -0.002(10) -0.014(11)
C24 0.082(16) 0.026(12) 0.061(12) 0.021(9) 0.014(11) -0.018(11)
C26 0.12(2) 0.050(15) 0.125(19) 0.012(13) 0.057(17) -0.024(14)
C27 0.048(14) 0.11(2) 0.098(16) -0.002(16) 0.017(12) -0.021(15)
C28 0.068(16) 0.051(15) 0.057(12) 0.011(11) 0.003(11) -0.032(13)
C29 0.054(15) 0.045(13) 0.079(15) -0.012(12) -0.008(12) -0.003(11)
C30 0.16(2) 0.12(2) 0.15(2) 0.050(16) 0.11(2) 0.098(18)
Cu1 0.0763(18) 0.0464(14) 0.0534(14) 0.0006(10) -0.0073(11) -0.0002(12)
Cu2 0.0626(16) 0.0431(14) 0.0572(13) 0.0075(10) 0.0110(11) -0.0042(11)
Dy1 0.0795(8) 0.0408(7) 0.0569(6) -0.0016(4) 0.0064(5) 0.0030(5)
N1 0.077(14) 0.038(9) 0.059(12) -0.012(8) -0.005(9) 0.010(9)
N2 0.073(13) 0.037(9) 0.059(11) -0.001(8) 0.002(9) -0.004(9)
O1 0.087(10) 0.049(7) 0.056(8) 0.014(6) 0.010(7) 0.006(7)
O3W 0.071(10) 0.061(9) 0.118(11) 0.000(7) 0.004(8) -0.001(7)
O2 0.114(11) 0.043(7) 0.054(8) 0.012(6) -0.034(7) -0.018(7)
O4W 0.088(10) 0.062(8) 0.077(9) -0.015(7) -0.013(7) -0.007(7)
O3 0.065(8) 0.045(7) 0.053(7) 0.013(6) 0.013(6) 0.012(6)
O5W 0.095(11) 0.080(9) 0.087(9) -0.004(7) 0.023(8) -0.004(8)
O4 0.063(9) 0.046(8) 0.066(9) 0.011(7) 0.015(7) -0.008(7)
O1W 0.075(11) 0.171(17) 0.174(16) -0.101(13) 0.007(10) -0.015(11)
O5 0.093(11) 0.083(11) 0.049(8) 0.004(7) -0.013(7) -0.008(8)
O2W 0.40(4) 0.22(3) 0.21(3) 0.01(2) 0.10(3) 0.14(3)
O6 0.057(8) 0.048(8) 0.046(7) 0.001(6) -0.004(6) -0.001(6)
O7 0.069(9) 0.051(9) 0.084(9) 0.007(7) 0.025(7) 0.003(7)
O8 0.086(10) 0.051(8) 0.067(9) 0.010(7) 0.019(7) -0.005(7)
O10 0.119(18) 0.041(13) 0.145(19) 0.000 0.000(14) 0.000
O12 0.26(3) 0.129(16) 0.18(2) -0.016(14) 0.100(18) 0.031(16)
O13 0.102(14) 0.141(16) 0.194(19) 0.052(13) 0.014(13) 0.026(12)
O14 0.086(12) 0.078(12) 0.22(2) -0.028(10) 0.014(12) -0.028(9)
O15 0.148(17) 0.136(16) 0.163(17) -0.013(12) 0.058(13) -0.044(14)
O16 0.143(18) 0.28(3) 0.161(17) 0.087(17) -0.007(13) -0.160(19)
O17 0.32(4) 0.15(2) 0.27(4) 0.011(18) 0.08(3) 0.02(2)
O18 0.12(3) 0.23(4) 0.20(3) 0.000 -0.01(2) 0.000
O19 0.077(18) 0.17(3) 0.18(2) 0.000 0.009(16) 0.000
 
_geom_special_details
;
 All s.u.'s (except the s.u. in the dihedral angle between two l.s. planes)
 are estimated using the full covariance matrix.  The cell s.u.'s are taken
 into account individually in the estimation of s.u.'s in distances, angles
 and torsion angles; correlations between s.u.'s in cell parameters are only
 used when they are defined by crystal symmetry.  An approximate (isotropic)
 treatment of cell s.u.'s is used for estimating s.u.'s involving l.s. planes.
;
 
loop_
 _geom_bond_atom_site_label_1
 _geom_bond_atom_site_label_2
 _geom_bond_distance
 _geom_bond_site_symmetry_2
 _geom_bond_publ_flag
C1 N2 1.36(2) . ?
C1 C2 1.40(2) . ?
C2 C3 1.38(3) . ?
C3 C4 1.39(3) . ?
C4 C5 1.38(2) . ?
C5 N2 1.40(2) . ?
C5 C6 1.45(2) . ?
C6 C7 1.53(3) . ?
C7 O1 1.43(2) . ?
C8 N1 1.34(2) . ?
C8 C9 1.45(3) . ?
C9 C10 1.35(3) . ?
C10 C11 1.38(3) . ?
C11 C12 1.44(3) . ?
C12 N1 1.34(2) . ?
C12 C13 1.47(3) . ?
C13 C14 1.51(2) . ?
C14 O2 1.43(2) . ?
C15 O3 1.333(18) . ?
C15 C20 1.38(2) . ?
C15 C16 1.39(2) . ?
C16 C17 1.41(2) . ?
C16 C21 1.45(3) . ?
C17 C18 1.35(2) . ?
C18 C19 1.37(2) . ?
C19 C20 1.35(2) . ?
C20 O5 1.425(19) . ?
C21 O4 1.21(2) . ?
C22 O5 1.437(17) . ?
C23 O6 1.319(18) . ?
C23 C24 1.38(2) . ?
C23 C28 1.40(2) . ?
C24 C29 1.42(2) . ?
C24 C25 1.43(2) . ?
C25 C26 1.29(2) . ?
C26 C27 1.35(3) . ?
C27 C28 1.39(3) . ?
C28 O7 1.33(2) . ?
C29 O8 1.19(2) . ?
C30 O7 1.48(2) . ?
Cu1 O2 1.929(11) . ?
Cu1 O3 1.961(11) . ?
Cu1 O4 1.979(11) . ?
Cu1 N1 1.986(15) . ?
Cu1 O5W 2.433(12) . ?
Cu1 Dy1 3.348(2) . ?
Cu2 O1 1.913(11) . ?
Cu2 O6 1.951(11) . ?
Cu2 N2 1.952(15) . ?
Cu2 O8 1.953(12) . ?
Cu2 Dy1 3.364(2) . ?
Dy1 O1 2.247(11) . ?
Dy1 O2 2.250(11) . ?
Dy1 O3 2.328(11) . ?
Dy1 O3W 2.332(12) . ?
Dy1 O6 2.363(10) . ?
Dy1 O4W 2.375(11) . ?
Dy1 O7 2.659(11) . ?
Dy1 O5 2.680(11) . ?
N3 O10 1.01(2) . ?
N3 O9 1.19(2) 2_756 ?
N3 O9 1.19(2) . ?
N4 O12 1.17(2) . ?
N4 O11 1.198(19) . ?
N4 O13 1.22(2) . ?
N5 O16 1.17(3) . ?
N5 O14 1.25(3) . ?
N5 O15 1.32(2) . ?
N6 O18 1.43(4) . ?
N6 O19 1.60(4) . ?
N6 O17 1.70(4) . ?
O9 O9 1.67(3) 2_756 ?
O18 N6 1.43(4) 2_656 ?
O18 O19 1.78(5) . ?
O19 N6 1.60(4) 2_656 ?
 
loop_
 _geom_angle_atom_site_label_1
 _geom_angle_atom_site_label_2
 _geom_angle_atom_site_label_3
 _geom_angle
 _geom_angle_site_symmetry_1
 _geom_angle_site_symmetry_3
 _geom_angle_publ_flag
N2 C1 C2 124.3(18) . . ?
C3 C2 C1 119(2) . . ?
C2 C3 C4 118.2(18) . . ?
C5 C4 C3 122(2) . . ?
C4 C5 N2 120.4(19) . . ?
C4 C5 C6 125(2) . . ?
N2 C5 C6 114.8(18) . . ?
C5 C6 C7 112.3(17) . . ?
O1 C7 C6 111.8(13) . . ?
N1 C8 C9 122(2) . . ?
C10 C9 C8 115(3) . . ?
C9 C10 C11 124(2) . . ?
C10 C11 C12 118(2) . . ?
N1 C12 C11 119(2) . . ?
N1 C12 C13 119.4(19) . . ?
C11 C12 C13 122(2) . . ?
C12 C13 C14 112.2(18) . . ?
O2 C14 C13 112.7(14) . . ?
O3 C15 C20 119.5(18) . . ?
O3 C15 C16 123.5(18) . . ?
C20 C15 C16 117.0(17) . . ?
C15 C16 C17 118.7(18) . . ?
C15 C16 C21 122.0(17) . . ?
C17 C16 C21 118.9(19) . . ?
C18 C17 C16 121.6(17) . . ?
C17 C18 C19 119.6(18) . . ?
C20 C19 C18 119.3(18) . . ?
C19 C20 C15 123.6(17) . . ?
C19 C20 O5 126.6(18) . . ?
C15 C20 O5 109.8(17) . . ?
O4 C21 C16 128.7(17) . . ?
O6 C23 C24 124.2(17) . . ?
O6 C23 C28 116.1(17) . . ?
C24 C23 C28 119.6(18) . . ?
C23 C24 C29 120.1(15) . . ?
C23 C24 C25 119.4(19) . . ?
C29 C24 C25 120.5(19) . . ?
C26 C25 C24 121(2) . . ?
C25 C26 C27 120(2) . . ?
C26 C27 C28 123(2) . . ?
O7 C28 C27 127(2) . . ?
O7 C28 C23 116.2(16) . . ?
C27 C28 C23 117(2) . . ?
O8 C29 C24 132.1(18) . . ?
O2 Cu1 O3 81.1(5) . . ?
O2 Cu1 O4 171.3(5) . . ?
O3 Cu1 O4 90.9(5) . . ?
O2 Cu1 N1 98.6(6) . . ?
O3 Cu1 N1 168.0(5) . . ?
O4 Cu1 N1 89.9(6) . . ?
O2 Cu1 O5W 93.0(5) . . ?
O3 Cu1 O5W 94.6(4) . . ?
O4 Cu1 O5W 84.0(4) . . ?
N1 Cu1 O5W 97.4(5) . . ?
O2 Cu1 Dy1 40.2(3) . . ?
O3 Cu1 Dy1 42.8(3) . . ?
O4 Cu1 Dy1 132.8(4) . . ?
N1 Cu1 Dy1 133.0(5) . . ?
O5W Cu1 Dy1 104.6(3) . . ?
O1 Cu2 O6 82.5(5) . . ?
O1 Cu2 N2 96.9(6) . . ?
O6 Cu2 N2 177.1(5) . . ?
O1 Cu2 O8 171.0(6) . . ?
O6 Cu2 O8 90.8(5) . . ?
N2 Cu2 O8 90.1(6) . . ?
O1 Cu2 Dy1 39.5(3) . . ?
O6 Cu2 Dy1 43.4(3) . . ?
N2 Cu2 Dy1 135.6(5) . . ?
O8 Cu2 Dy1 134.1(4) . . ?
O1 Dy1 O2 125.9(5) . . ?
O1 Dy1 O3 92.5(4) . . ?
O2 Dy1 O3 67.1(4) . . ?
O1 Dy1 O3W 143.1(4) . . ?
O2 Dy1 O3W 86.5(5) . . ?
O3 Dy1 O3W 84.4(4) . . ?
O1 Dy1 O6 67.1(4) . . ?
O2 Dy1 O6 96.0(4) . . ?
O3 Dy1 O6 139.3(4) . . ?
O3W Dy1 O6 133.2(4) . . ?
O1 Dy1 O4W 80.9(4) . . ?
O2 Dy1 O4W 148.0(4) . . ?
O3 Dy1 O4W 135.7(4) . . ?
O3W Dy1 O4W 76.2(4) . . ?
O6 Dy1 O4W 77.7(4) . . ?
O1 Dy1 O7 125.1(4) . . ?
O2 Dy1 O7 77.3(4) . . ?
O3 Dy1 O7 139.4(4) . . ?
O3W Dy1 O7 74.2(4) . . ?
O6 Dy1 O7 61.1(4) . . ?
O4W Dy1 O7 72.2(4) . . ?
O1 Dy1 O5 77.3(4) . . ?
O2 Dy1 O5 123.1(4) . . ?
O3 Dy1 O5 60.2(4) . . ?
O3W Dy1 O5 69.3(4) . . ?
O6 Dy1 O5 138.2(4) . . ?
O4W Dy1 O5 75.7(4) . . ?
O7 Dy1 O5 135.9(4) . . ?
O1 Dy1 Cu1 106.2(3) . . ?
O2 Dy1 Cu1 33.6(3) . . ?
O3 Dy1 Cu1 34.9(3) . . ?
O3W Dy1 Cu1 92.0(3) . . ?
O6 Dy1 Cu1 115.2(2) . . ?
O4W Dy1 Cu1 166.7(3) . . ?
O7 Dy1 Cu1 110.7(3) . . ?
O5 Dy1 Cu1 94.7(3) . . ?
O1 Dy1 Cu2 32.8(3) . . ?
O2 Dy1 Cu2 111.9(3) . . ?
O3 Dy1 Cu2 115.7(3) . . ?
O3W Dy1 Cu2 156.5(3) . . ?
O6 Dy1 Cu2 34.6(3) . . ?
O4W Dy1 Cu2 80.7(3) . . ?
O7 Dy1 Cu2 95.0(3) . . ?
O5 Dy1 Cu2 108.8(3) . . ?
Cu1 Dy1 Cu2 111.47(6) . . ?
C12 N1 C8 121.6(17) . . ?
C12 N1 Cu1 120.1(16) . . ?
C8 N1 Cu1 118.3(14) . . ?
C1 N2 C5 116.3(16) . . ?
C1 N2 Cu2 119.6(13) . . ?
C5 N2 Cu2 124.1(14) . . ?
O10 N3 O9 135.4(14) . 2_756 ?
O10 N3 O9 135.4(14) . . ?
O9 N3 O9 89(3) 2_756 . ?
O12 N4 O11 128(3) . . ?
O12 N4 O13 120(2) . . ?
O11 N4 O13 112(2) . . ?
O16 N5 O14 131(3) . . ?
O16 N5 O15 114(3) . . ?
O14 N5 O15 115(3) . . ?
O18 N6 O19 72(3) . . ?
O18 N6 O17 136(3) . . ?
O19 N6 O17 133(3) . . ?
C7 O1 Cu2 116.1(11) . . ?
C7 O1 Dy1 135.1(10) . . ?
Cu2 O1 Dy1 107.7(5) . . ?
C14 O2 Cu1 114.7(10) . . ?
C14 O2 Dy1 131.3(10) . . ?
Cu1 O2 Dy1 106.2(5) . . ?
C15 O3 Cu1 124.8(11) . . ?
C15 O3 Dy1 131.2(11) . . ?
Cu1 O3 Dy1 102.3(5) . . ?
C21 O4 Cu1 123.9(13) . . ?
C20 O5 C22 113.2(14) . . ?
C20 O5 Dy1 118.7(10) . . ?
C22 O5 Dy1 127.8(11) . . ?
C23 O6 Cu2 124.3(11) . . ?
C23 O6 Dy1 128.0(11) . . ?
Cu2 O6 Dy1 102.1(5) . . ?
C28 O7 C30 118.5(15) . . ?
C28 O7 Dy1 116.3(10) . . ?
C30 O7 Dy1 125.0(11) . . ?
C29 O8 Cu2 122.9(13) . . ?
N3 O9 O9 45.4(14) . 2_756 ?
N6 O18 N6 117(5) 2_656 . ?
N6 O18 O19 59(2) 2_656 . ?
N6 O18 O19 59(2) . . ?
N6 O19 N6 99(4) . 2_656 ?
N6 O19 O18 49.5(18) . . ?
N6 O19 O18 49.5(18) 2_656 . ?
 
_diffrn_measured_fraction_theta_max    0.992
_diffrn_reflns_theta_full              19.50
_diffrn_measured_fraction_theta_full   0.992
_refine_diff_density_max    2.051
_refine_diff_density_min   -1.591
_refine_diff_density_rms    0.141
